# Supplementary material for: Downregulation of m6A demethylase ALKBH5 promotes AuNP-induced neural stem cell quiescence via regulating ID4 expression
Source: Royal Society of Chemistry journal article supplement (doi:10.1039/d2en00734g), 2023-01-01
Supplement: d2en00734g1.pdf [file d2en00734g1.pdf]

## Downregulation of m<sup>6</sup>A demethylase ALKBH5 promotes AuNPs-induced neural stem cells quiescence via regulating ID4 expression

Xiaofeng Huang<sup>1,2#</sup>, Renjun Yang<sup>1,2#</sup>, Zijuan Qi<sup>1,3</sup>, Xudong Wang<sup>1,2</sup>, Nuoya Yin<sup>1,2</sup>,  
Francesco Faiola<sup>1,2</sup>, Sijin Liu<sup>1,2</sup>, Ming Gao<sup>1,2\*</sup>

1. State Key Laboratory of Environmental Chemistry and Ecotoxicology, Research Center for Eco-Environmental Sciences, Chinese Academy of Sciences, Beijing, 100085, China
2. College of Resources and Environment, University of Chinese Academy of Sciences, Beijing, 100085, China
3. Department of Orthopedic Surgery, The First Affiliated Hospital of Shandong First Medical University, Ji'nan 250014, Shandong, China

# These authors contribute equally: Xiaofeng Huang, Renjun Yang

Authors for correspondence: [minggao@rcees.ac.cn](mailto:minggao@rcees.ac.cn)

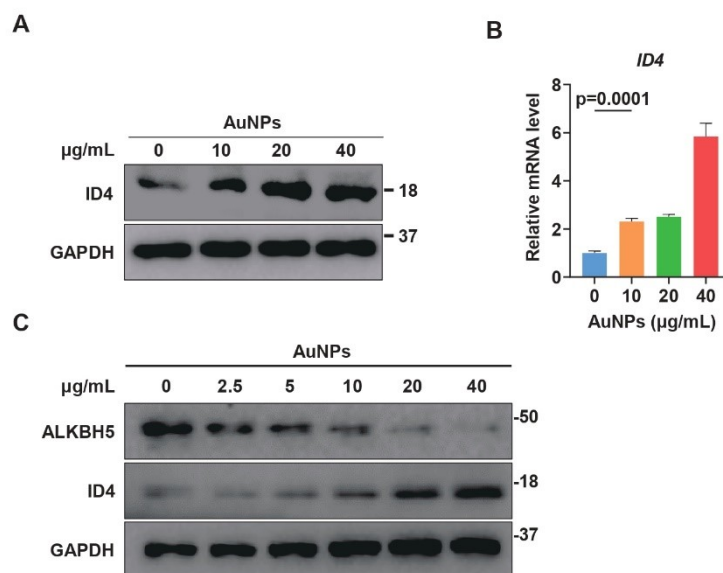

**Fig. S1.** AuNPs exposure promotes ID4 expression in HepG2 cells and SH-SY5Y cells. (A, B) Western blot (A) or qPCR analysis (B) of ID4 protein levels in HepG2 cells that treated with the indicated concentrations of AuNP30. (C) Western blot analysis of

ALKBH5 and ID4 levels in SH-SY5Y cells that treated with different concentrations of AuNP30. Data are shown as means  $\pm$  S.D.

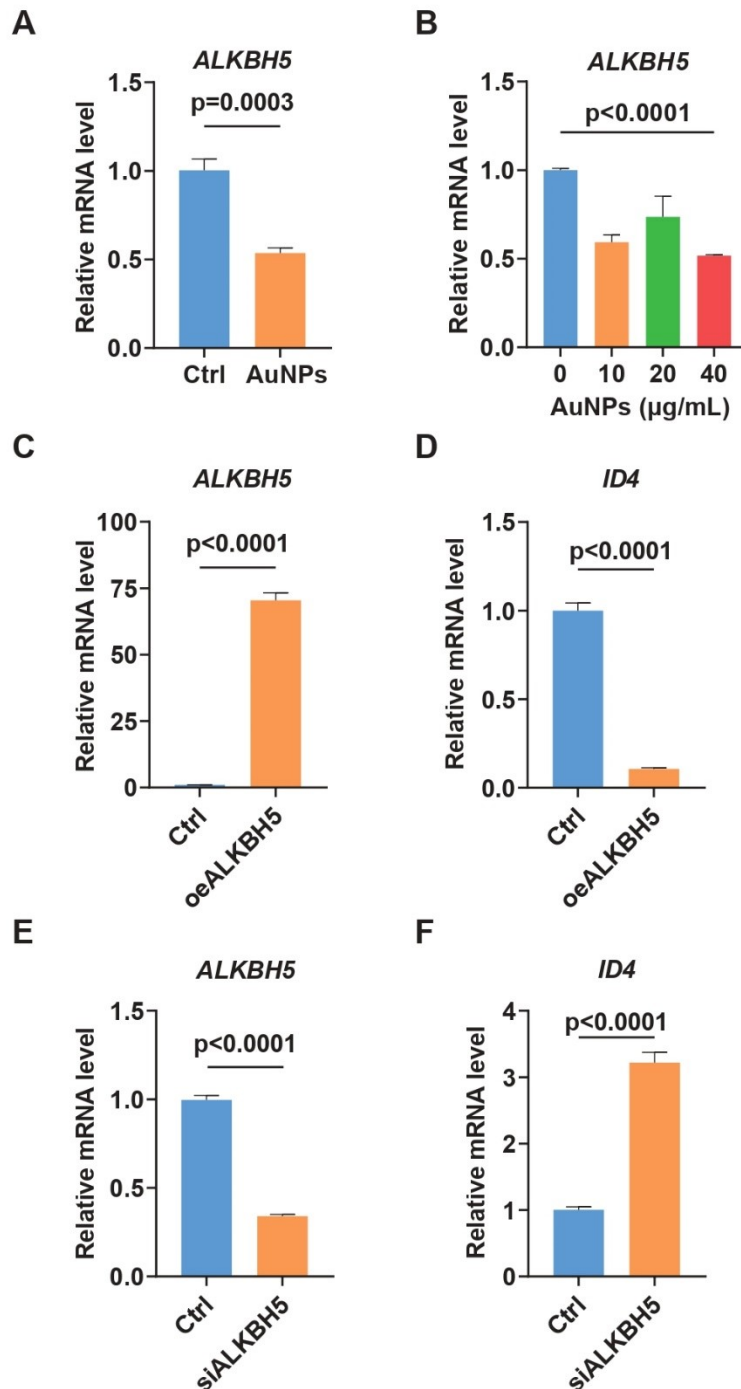

**Fig. S2.** AuNPs exposure promotes ID4 expression via down-regulating ALKBH5. (A, B) qPCR analysis of ALKBH5 mRNA levels in NSCs (A) or HepG2 (B) cells that treated with 10  $\mu$ g/mL AuNP30 (n = 3). (C-F) HepG2 cells were transfected with or without ALKBH5 overexpression construct (C, D), or ALKBH5 siRNA (E, F) for 48

h, the mRNA levels of ALKBH5 and ID4 were then analyzed by qPCR assay (n = 3).  
Data are shown as means  $\pm$  S.D.

**Table 1. The sequences of qPCR primers and siRNAs.**

| Target        | Forward/Reverse primer (5'-3')                        |
|---------------|-------------------------------------------------------|
| <i>ID1</i>    | AATTACGTGCTCTGTGGGTCTCCC<br>GTCTCTGGTGACTAGTAGGTGTGC  |
| <i>ID2</i>    | TCCAATCCTGTGCTGCTA<br>ACTCTGTGAATCCCGTTT              |
| <i>ID3</i>    | AACTTCGCCCTGCCACTTGACTT<br>CACCTCCACGCTCTGAAAAGACCT   |
| <i>ID4</i>    | ACGACTGCTATAGCCGCCTG<br>ACGTGCTGCAGGATCTCCAC          |
| <i>BMP4</i>   | CTCCAAGAATGGAGGCTGTAGGAA<br>CCTATGAGATGGAGCAGGCAAGA   |
| <i>ASCL1</i>  | CGGCCAACAAGAAGATGAGT<br>TGGAGTAGTTGGGGGAGATG          |
| <i>PAX6</i>   | ATGAGGCTCAAATGCGACTT<br>CATTTGGCCCTTCGATTAGA          |
| <i>SOX2</i>   | CATCACCCACAGCAAATGAC<br>TTTTTCGTCGCTTGAGACT           |
| <i>BTG1</i>   | AGCTGAACCTGTATCTGCGG<br>GAATTCCTGGTGCCAAAGGC          |
| <i>NOTCH1</i> | GCGGCCGCCTTTGTGCTTCTGTTC<br>GCCGGCGCGTCCTCCTCTTCC     |
| <i>NOTCH2</i> | TCGTGCAAGAGCCAGTTACCC<br>AATGTCATGGCCGCTTCAGAG        |
| <i>NOTCH3</i> | AAGTTACCCCAAGAGGCAAGTGTT<br>AAGGAAATGAGAGGCCAGAAGGAGA |
| <i>HES1</i>   | CAAAGACAGCATCTGAGCA<br>CATTGATCTGGGTCATGCAG           |
| <i>HES5</i>   | CTCAGCCCCAAAGAGAAAAA<br>TAGTCCTGGTGCAGGCTCTT          |
| <i>P21</i>    | CCTGTCACTGTCTTGTACCCT<br>GCGTTTGGAGTGGTAGAAATCT       |
| <i>P27</i>    | TAATTGGGGCTCCGGCTAACT<br>TTGCAGGTCGCTTCCTTATTC        |
| <i>P53</i>    | CCGCAGTCAGATCCTAGCG<br>AATCATCCATTGCTTGGGACG          |
| <i>CDK1</i>   | TAGCGCGGATCTACCATAACC<br>CATGGCTACCACTTGACCTGT        |
| <i>CDK2</i>   | CAGGATGTGACCAAGCCAGT<br>TGAGTCCAAATAGCCCAAGG          |

|                  |                                                   |
|------------------|---------------------------------------------------|
| <i>CD44</i>      | AGCAACTGAGACAGCAACCA<br>AGACGTACCAGCCATTTGTGT     |
| <i>METTL3</i>    | CAAGCTGCACTTCAGACGAA<br>GCTTGGCGTGTGGTCTTT        |
| <i>METTL14</i>   | GACGGGGACTTCATTCATGC<br>CCAGCCTGGTCTGAATTGTAC     |
| <i>METTL16</i>   | GGCAGAAGGAGGTGAATTAGAG<br>TTCCCAGCATGCAGCTATAC    |
| <i>WATP</i>      | ACTGGCCTAAGAGAGTCTGAAG<br>GTTGCTAGTCGCATTACAAGGA  |
| <i>YTHDC1</i>    | GAGGGCCAAATCTCCTACGC<br>GTCTCATGGTCAGAGCCATATTC   |
| <i>YTHDC2</i>    | AGGACATTCGCATTGATGAGG<br>CTCTGGTCCCCGTATCGGA      |
| <i>IGF2BP1</i>   | GGCCATCGAGAATTGTTGCAG<br>CCAGGGATCAGGTGAGACTG     |
| <i>IGF2BP2</i>   | AGCCTGTCACCATCCATGC<br>CTTCGGCTAGTTTGGTCTCATC     |
| <i>IGF2BP3</i>   | ACGAAATATCCCGCCTCATTTAC<br>GCAGTTTCCGAGTCAGTGTTCA |
| <i>HNRNPA2B1</i> | ATTGATGGGAGAGTAGTTGAGCC<br>AATTCCGCCAACAAACAGCTT  |
| <i>HNRNPC</i>    | GTTACCAACAAGACAGATCCTCG<br>AGGCAAAGCCCTTATGAACAG  |
| <i>ALKBH5</i>    | ACCCCATCCACATCTTCGAG<br>CTTGATGTCCTGAGGCCGTA      |
| <i>FTO</i>       | AGACACCTGGTTTGGCGATA<br>CCAAGGTTCTGTTGAGCAC       |
| <i>18S</i>       | CAGCCACCCGAGATTGAGCA<br>TAGTAGCGACGGGCGGTGTG      |
| <i>GAPDH</i>     | GAAGGTGAAGGTCCGAGT<br>GAAGATGGTGATGGGATTTC        |
| <i>siFTO</i>     | GCAGAATGTCTGTGACGAT                               |
| <i>siMETTL3</i>  | CGTCAGTATCTTGGGCAAGTT                             |
| <i>siMETTL14</i> | AAGGATGAGTTAATAGCTAAA                             |
| <i>siALKBH5</i>  | GAAAGGCTGTTGGCATCAATA                             |
| <i>siIGF2BP3</i> | CTGGCAGAGTTATTGGAAA                               |
