# Supplementary material for: Downregulation of m6A demethylase ALKBH5 promotes AuNP-induced neural stem cell quiescence via regulating ID4 expression
Source: Royal Society of Chemistry journal article supplement (doi:10.1039/d2en00734g), 2023-01-01
Supplement: d2en00734g2.xlsx [file d2en00734g2.xlsx]

## Sheet: Figure 3
B
D

## Sheet: Figure 4
A						E										K
B
						H
																N

## Sheet: Figure 5
B								D							E
C

## Sheet: Figure 6
C								D								E

## Sheet: Figure 7
A											B

## Sheet: Figure S1
A											C
